# Supplementary material
Source: PubMed Central journal article supplement (PMC6013651)
Supplement: IAI.00946-17_zii999092458s7.pdf [file IAI.00946-17_zii999092458s7.pdf]

## Supplemental Information Legends

Supplemental Figure 1. Cell viability and PMP in Cn and Cg infected BMDM. A-D) Representative populations of Live, Dead, Apoptotic populations. E-L) Representative populations of Live (E-H) and Apoptotic (I-L) J774 cells infected with Cn and Cg to examine PMP.

Supplemental Figure 2. Cell viability and PMP in Cn and Cg infected J774 cells. A-D) Representative populations of J774 infected cells (Live, Dead, and Apoptotic) with Cn and Cg. Among two independent experiments performed, results were comparable. E) Cell viability in in J774 cells examined each population of cells. F-M) Representative populations of infected J774 cells examining PMP for live (F-I) and apoptotic (J-M). Among two biological replicates, results were comparable. N) PMP in Cn and Cg infected live and apoptotic J774 cells. Error bars represent standard deviation.

Supplemental Figure 3. Genes differentially expressed in BMDM upon Cn H99 and Cg R265 infection. A) Venn diagrams of differentially expressed genes for BMDM for each comparison. B) Clustering of genes differentially regulated upon infection for a total of 1134 genes. Color scale in heatmaps correspond to z-scores of standardized intensity values for each sample. Experiment performed in BMDM derived from three mice across all conditions.

Supplemental Table 1. Statistical results for 2-way ANOVA relevant to Figure 4.

Supplemental Table 2. Gene differentially expressed in BMDM upon Cn H99 and Cg R265 infection.

Supplemental Table 3. Genes differentially regulated as determined by qPCR.
