# Supplementary material
Source: PubMed Central journal article supplement (PMC6013651)

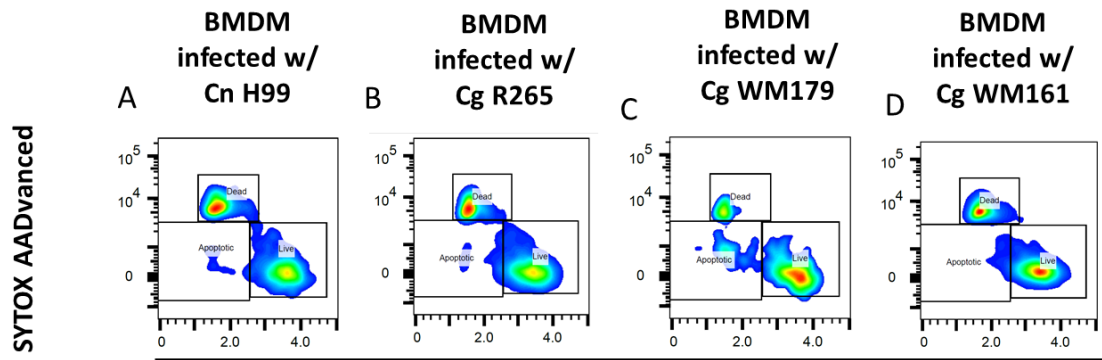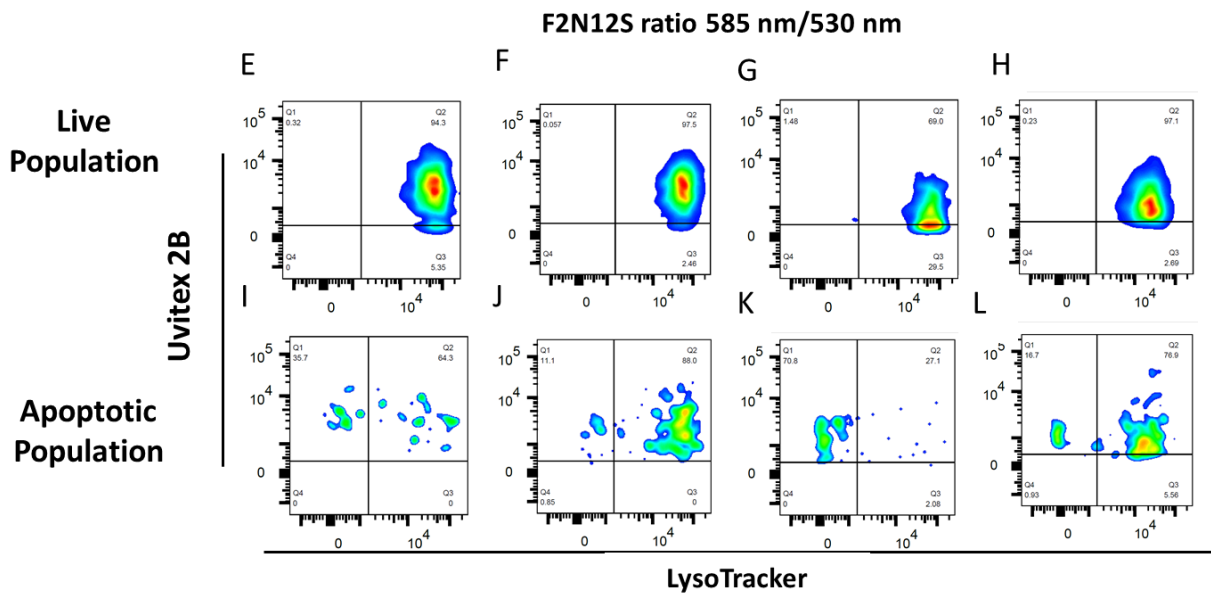

Supplement: IAI.00946-17_zii999092458s4.pdf [file IAI.00946-17_zii999092458s4.pdf]

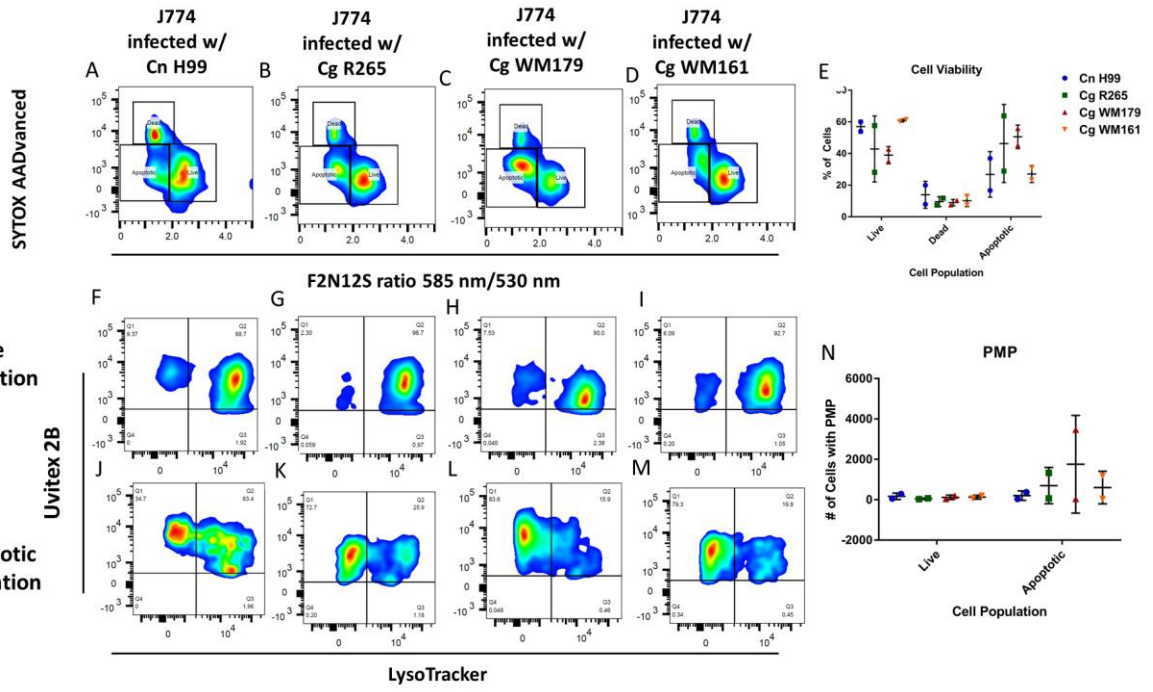

Supplement: IAI.00946-17_zii999092458s5.pdf [file IAI.00946-17_zii999092458s5.pdf]

**A**

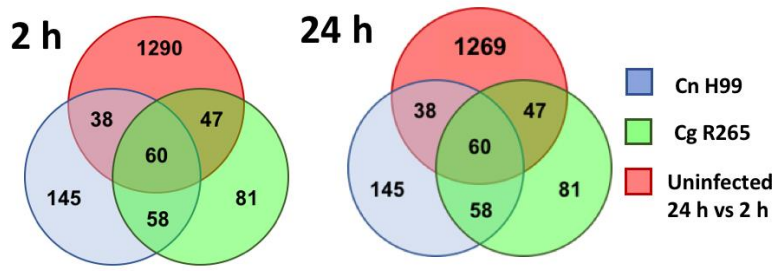

**B**

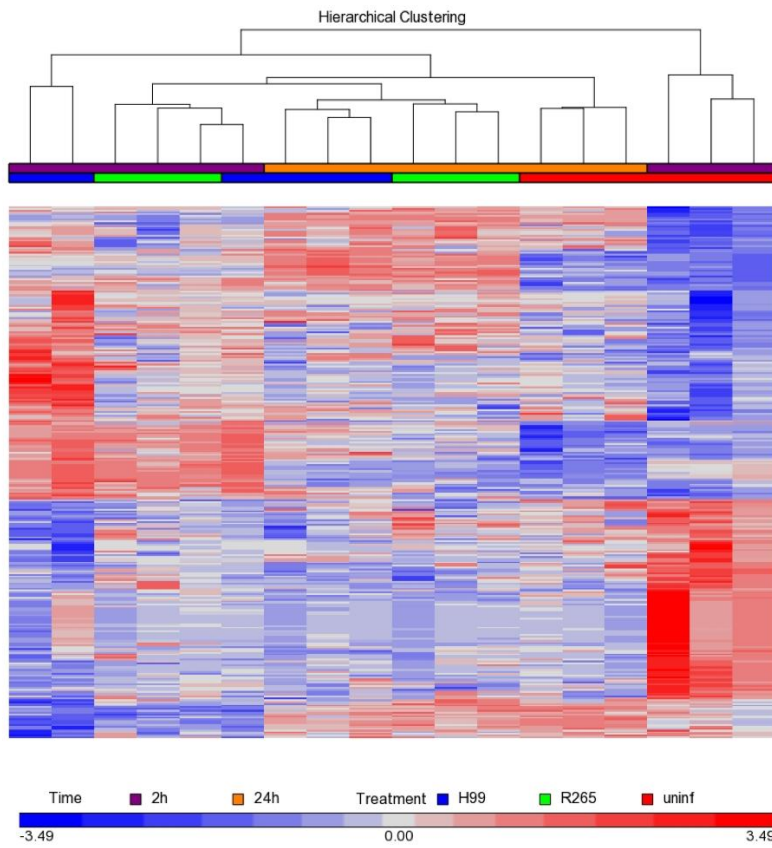

Supplement: IAI.00946-17_zii999092458s6.pdf [file IAI.00946-17_zii999092458s6.pdf]
